# Supplementary figures and images for: Reduced diversity and increased virulence-gene carriage in intestinal enterobacteria of coeliac children
Source: Springer Nature journal article supplement (doi:10.1186/1471-230x-8-50), 2008-11-04

**A****B****C**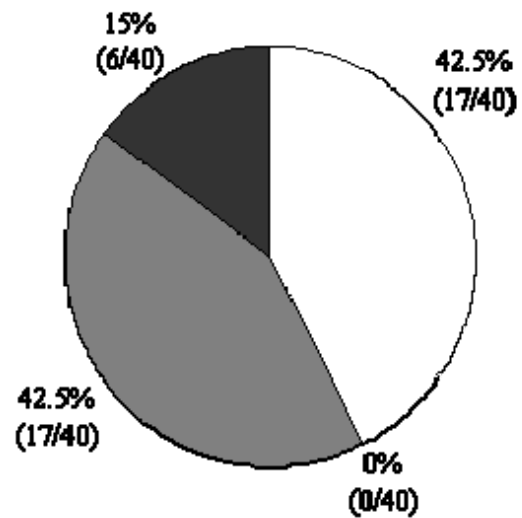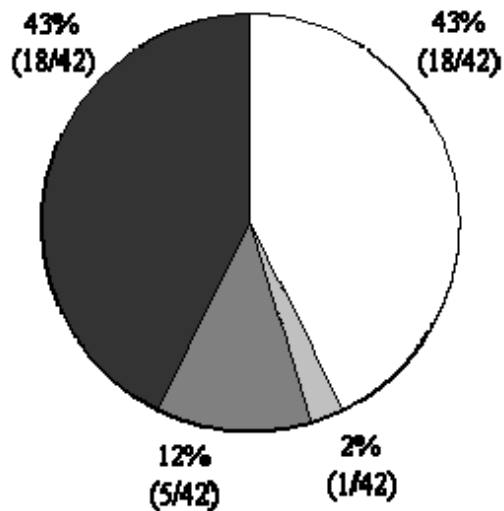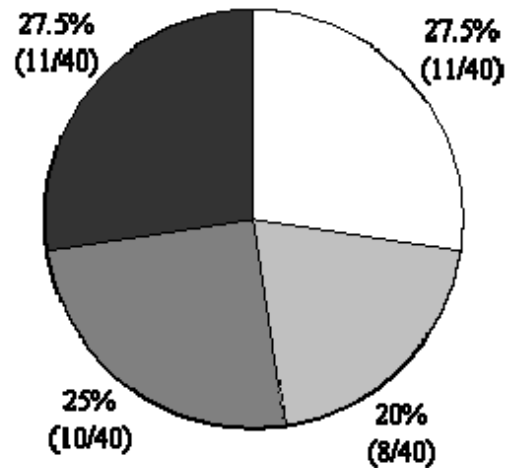□ **A**□ **B1**■ **B2**■ **D**

Supplement: 12876_2008_283_MOESM1_ESM.pdf [file 12876_2008_283_MOESM1_ESM.pdf]

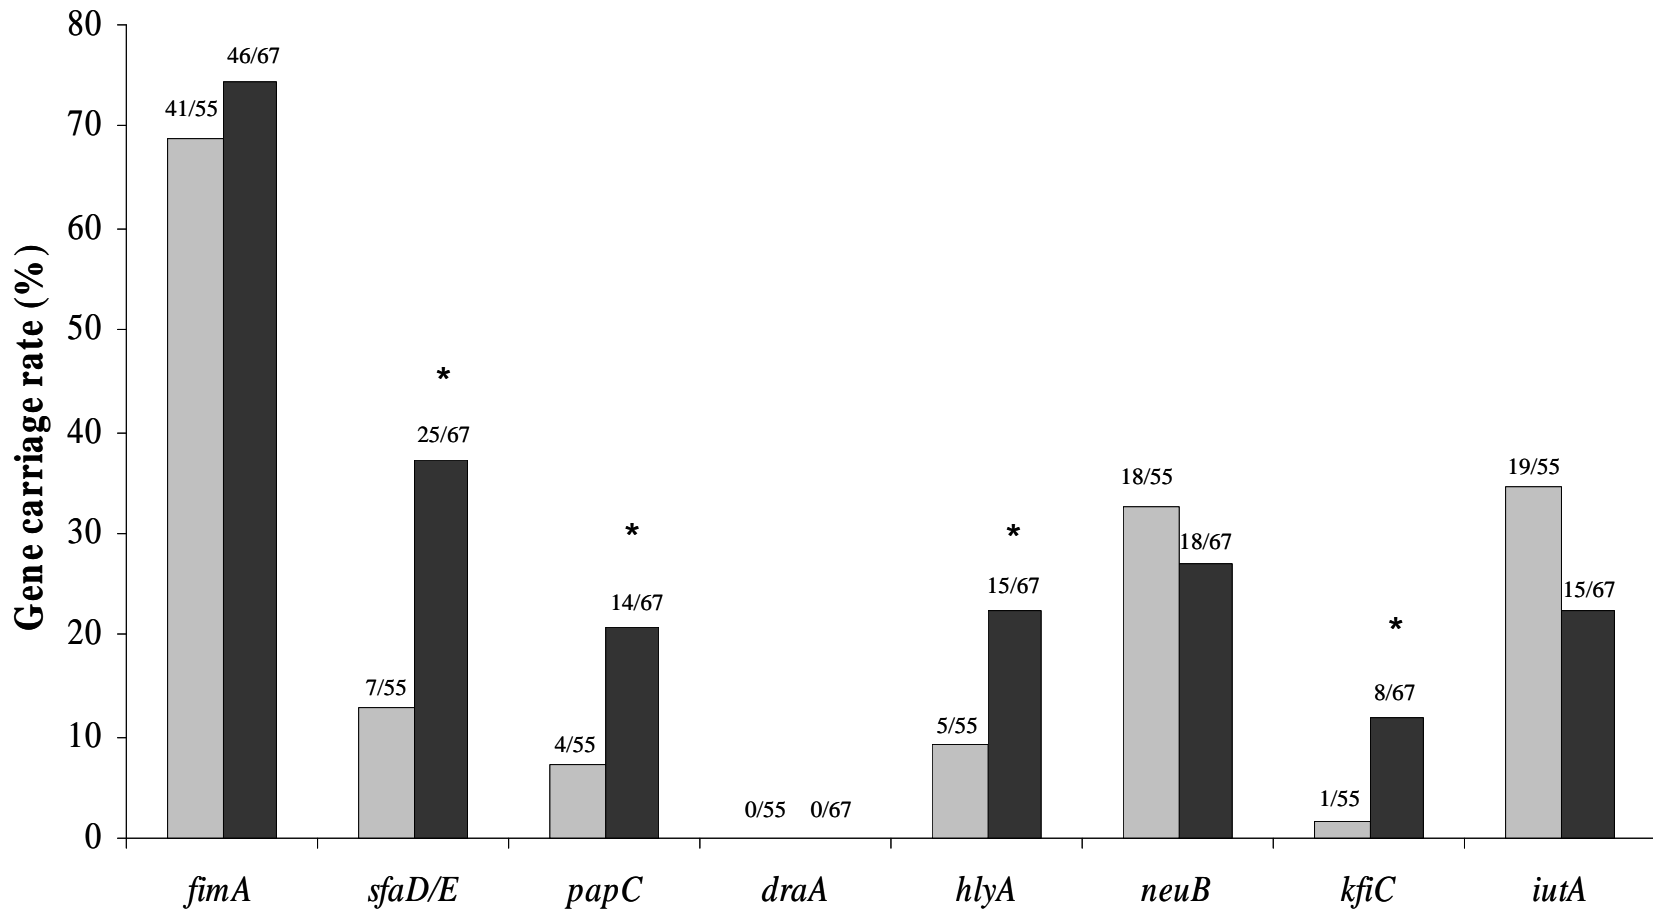

Supplement: 12876_2008_283_MOESM2_ESM.pdf [file 12876_2008_283_MOESM2_ESM.pdf]
